# Supplementary material for: Role of the CX3C chemokine receptor CX3CR1 in the pathogenesis of atherosclerosis after aortic transplantation
Source: PLoS One. 2017 Feb 24;12(2):e0170644. doi: 10.1371/journal.pone.0170644 (PMC5325192; doi:10.1371/journal.pone.0170644)
Supplement: S1 Table — The original raw data table (in a Excel spreadsheet) that were used to generate our bar graphs. (XLSX) [file pone.0170644.s002.xlsx]

## Sheet: Tabelle1
Role of the CX3C chemokine receptor CX3CR1 in the pathogenesis of atherosclerosis after aortic transplantation
Rowinska et al, 2017
Plaque area (µm²)
Apoe-/- >Apoe-/-	Cx3cr1-/- > Apoe-/-	Apoe-/- > Cx3cr1-/-
18827.9	2672.6	9538.4
10105.5	499.75	4930.5
16108.3	2172.85	12212.4
15846.2	1609.35	6301.4
	445.1	4510.07
SMC positive cells (% from total nuclei)					SMC positive cells (per mm²)
Apoe-/- >Apoe-/-	Cx3cr1-/- > Apoe-/-	Apoe-/- > Cx3cr1-/-			Apoe-/- >Apoe-/-	Cx3cr1-/- > Apoe-/-	Apoe-/- > Cx3cr1-/-
56.5647	12.8734	11.4471			1364.29	38.0952	126.191
29.0879	4.28954	22.1327			2969.05	11.9048	850
26.1468	1.11111	33.3333			619.048	339.286	309.524
85.5122	11.9816	3.53218			2207.14	42.14	53.5714
	5.3125	38.6364				12.96	809.524
Mac2 positive cells (% from total nuclei)					Mac2 positive cells (per mm²)
Apoe-/- >Apoe-/-	Cx3cr1-/- > Apoe-/-	Apoe-/- > Cx3cr1-/-			Apoe-/- >Apoe-/-	Cx3cr1-/- > Apoe-/-	Apoe-/- > Cx3cr1-/-
22.2222	3.66973	0			23.8095	47.6191	23.8095
3.11042	3.125	7.54717			12.3	47.6191	47.6191
4.34783	5.62746	6.34584			47.6191	142.857	42.35
86.9027	0	4.41176			497.143	38.619	47.6191
	0	4.46429				0	23.0952
Ki67 positive cells (per mm²)
Apoe-/- >Apoe-/-	Cx3cr1-/- > Apoe-/-	Apoe-/- > Cx3cr1-/-
0	0	7.14286
792.857	0	78.5714
23.8095	0	0
40.4762	0	0
	0	135.714
TUNEL positive cells (per mm²)
Apoe-/- >Apoe-/-	Cx3cr1-/- > Apoe-/-	Apoe-/- > Cx3cr1-/-
40.4762	0	11.9048
64.2857	16.6667	78.5714
7.14286	7.14286	11.9048
190.476	11.9048	221.429
	7.14286	30.9524
